# Supplementary material
Source: HighWire-hosted journal article supplement (https://bmjopen.bmj.com/content/8/6/e020097)
Supplement: inline-supplementary-material-1 [file inline-supplementary-material-1.pdf]

**Supplemental A** ICD9/10 Code for Opioid-Related Serious Adverse Events (SAEs)

| Serious Adverse Events  | ICD9                                                                                                                                           | ICD10                                                                                                                                                                                                                                                                                                                                                                                                                                                                                                                                                                                                                                                                                                                                                                       |
|-------------------------|------------------------------------------------------------------------------------------------------------------------------------------------|-----------------------------------------------------------------------------------------------------------------------------------------------------------------------------------------------------------------------------------------------------------------------------------------------------------------------------------------------------------------------------------------------------------------------------------------------------------------------------------------------------------------------------------------------------------------------------------------------------------------------------------------------------------------------------------------------------------------------------------------------------------------------------|
| Involving acetaminophen | 965.4; 967.0,.8; 968.0; 969.1,.2,3,4,5; E850.4; E851.; E852.0,.1,3,4,5,8,9; E853.0,.1,2,8,9; E935.4; E937.0,.8; E938.0; E939.1,2,4,5; E980.1,3 | T39.1X1A,D,S; T39.1X2A,D,S; T39.1X3A,D,S; T39.1X4A,D,S; T39.1X5A,D,S; T39.8X1A,D,S; T39.8X2A,D,S; T39.8X3A,D,S; T39.8X4A,D,S; T39.8X5A,D,S; T39.91XA,D,S; T39.92XA,D,S; T39.93XA,D,S; T39.94XA,D,S; T39.95XA,D,S;                                                                                                                                                                                                                                                                                                                                                                                                                                                                                                                                                           |
| Opioid overdose         | 965.00,01,02,09; E850.0,.1,2; E935.0,.1,2; E908.0                                                                                              | T40.0X1A,D,S; T40.0X2A,D,S; T40.0X3A,D,S; T40.0X4A,D,S; T40.0X5A,D,S; T40.1X1A,D,S; T40.1X2A,D,S; T40.1X3A,D,S; T40.1X4A,D,S; T40.2X1A,D,S; T40.2X2A,D,S; T40.2X3A,D,S; T40.2X4A,D,S; T40.2X5A,D,S; T40.3X1A,D,S; T40.3X2A,D,S; T40.3X3A,D,S; T40.3X4A,D,S; T40.3X5A,D,S; T40.4X1A,D,S; T40.4X2A,D,S; T40.4X3A,D,S; T40.4X4A,D,S; T40.4X5A,D,S; T40.601A,D,S; T40.602A,D,S; T40.603A,D,S; T40.604A,D,S; T40.605A,D,S; T40.691A,D,S; T40.692A,D,S; T40.693A,D,S; T40.694A,D,S; T40.695A,D,S                                                                                                                                                                                                                                                                                  |
| Other drug poisoning    | 965.1,.6,61,69; 969.01,.02,03,04,.05,09,6,72; 970.1; E850.3; E854.0,.1,3; E855.0,.1,2,3,4,5,6,8,9; E935.3,6; E939.0,6,7; E940.1; E980.4,5      | T40.7X1A,D,S; T40.7X2A,D,S; T40.7X3A,D,S; T40.7X4A,D,S; T40.7X5A,D,S; T40.8X1A,D,S; T40.8X2A,D,S; T40.8X3A,D,S; T40.8X4A,D,S; T44.901A,D,S; T44.902A,D,S; T44.903A,D,S; T44.904A,D,S; T44.991A,D,S; T44.992A,D,S; T44.993A,D,S; T44.994A,D,S; T44.995A,D,S; T50.7X1A,D,S; T50.7X2A,D,S; T50.7X3A,D,S; T50.7X4A,D,S; T50.7X5A,D,S                                                                                                                                                                                                                                                                                                                                                                                                                                            |
| Falls                   | E880.0,.1,9; E881.0,.1; E882.; E883.0,.1,2,9; E884.0,.1,2,3,4,5,6,9; E885,0,.1,2,3,4,9; E886.0,9; E887.; E888,0,.1,8,9; E929.3;                | R29.6; W00.0XXA,D,S; W00.1XXA,D,S; W00.2XXA,D,S; W00.9XXA,D,S; W01.0XXA,D,S; W01.10XXA,D,S; W01.110XXA,D,S; W01.111XXA,D,S; W01.118XXA,D,S; W01.119XXA,D,S; W01.190XXA,D,S; W01.198XXA,D,S; W03.XXXA,D,S; W04.XXXA,D,S; W05.0XXA,D,S; W05.1XXA,D,S; W05.2XXA,D,S; W06.XXXA,D,S; W07.XXXA,D,S; W08.XXXA,D,S; W09.0XXA,D,S; W09.1XXA,D,S; W09.2XXA,D,S; W09.8XXA,D,S; W10.0XXA,D,S; W10.1XXA,D,S; W10.2XXA,D,S; W10.8XXA,D,S; W10.9XXA,D,S; W11.XXXA,D,S; W12.XXXA,D,S; W13.0XXA,D,S; W13.1XXA,D,S; W13.2XXA,D,S; W13.3XXA,D,S; W13.4XXA,D,S; W13.8XXA,D,S; W13.9XXA,D,S; W14.XXXA,D,S; W15.XXXA,D,S; W16.011A,D,S; W16.012A,D,S; W16.021A,D,S; W16.022A,D,S; W16.031A,D,S; W16.032A,D,S; W16.111A,D,S; W16.112A,D,S; W16.121A,D,S; W16.122A,D,S; W16.131A,D,S; W16.132A,D,S; |

|         |                                                                                                                                                                                                                                                                                                                                                                                                                                                                                                                                                                                                                                                                            |                                                                                                                                                                                                                                                                                                                                                                                                                                                                                                                                                                                                                                                                                                                                                                                                                                                                                                                                                                                                                                                                                                                                                                                                                                                                                                                                                                                                                                                                                                                                                                                                                                                                                                                                                                                                                                                                                                                                                                                                                                                                                                                                                                                                                                                                                                                                                                                                                                                                                                                                         |
|---------|----------------------------------------------------------------------------------------------------------------------------------------------------------------------------------------------------------------------------------------------------------------------------------------------------------------------------------------------------------------------------------------------------------------------------------------------------------------------------------------------------------------------------------------------------------------------------------------------------------------------------------------------------------------------------|-----------------------------------------------------------------------------------------------------------------------------------------------------------------------------------------------------------------------------------------------------------------------------------------------------------------------------------------------------------------------------------------------------------------------------------------------------------------------------------------------------------------------------------------------------------------------------------------------------------------------------------------------------------------------------------------------------------------------------------------------------------------------------------------------------------------------------------------------------------------------------------------------------------------------------------------------------------------------------------------------------------------------------------------------------------------------------------------------------------------------------------------------------------------------------------------------------------------------------------------------------------------------------------------------------------------------------------------------------------------------------------------------------------------------------------------------------------------------------------------------------------------------------------------------------------------------------------------------------------------------------------------------------------------------------------------------------------------------------------------------------------------------------------------------------------------------------------------------------------------------------------------------------------------------------------------------------------------------------------------------------------------------------------------------------------------------------------------------------------------------------------------------------------------------------------------------------------------------------------------------------------------------------------------------------------------------------------------------------------------------------------------------------------------------------------------------------------------------------------------------------------------------------------------|
|         | E987.0,.1,.2,.9                                                                                                                                                                                                                                                                                                                                                                                                                                                                                                                                                                                                                                                            | W16.211A,D,S; W16.212A,D,S; W16.221A,D,S; W16.222A,D,S; W16.311A,D,S; W16.312A,D,S; W16.322A,D,S; W16.331A,D,S; W16.332A,D,S; W16.41XA,D,S; W16.42XA,D,S; W16.511A,D,S; W16.512A,D,S; W16.521A,D,S; W16.522A,D,S; W16.531A,D,S; W16.532A,D,S; W16.611A,D,S; W16.612A,D,S; W16.621A,D,S; W16.622A,D,S; W16.711A,D,S; W16.712A,D,S; W16.721A,D,S; W16.722A,D,S; W16.811A,D,S; W16.812A,D,S; W16.821A,D,S; W16.822A,D,S; W16.831A,D,S; W16.832A,D,S; W16.91XA,D,S; W16.92XA,D,S; W17.0XXA,D,S; W17.1XXA,D,S; W17.2XXA,D,S; W17.3XXA,D,S; W17.4XXA,D,S; W17.81XA,D,S; W17.82XA,D,S; W17.89XA,D,S; W18.00XA,D,S; W18.01XA,D,S; W18.02XA,D,S; W18.09XA,D,S; W18.11XA,D,S; W18.12XA,D,S; W18.2XXA,D,S; W18.30XA,D,S; W18.31XA,D,S; W18.39XA,D,S; W18.40XA,D,S; W18.41XA,D,S; W18.42XA,D,S; W18.43XA,D,S; W18.49XA,D,S; W19.XXXA,D,S; X00.3XXA,D,S; X01.3XXA,D,S; X02.3XXA,D,S; X03.3XXA,D,S                                                                                                                                                                                                                                                                                                                                                                                                                                                                                                                                                                                                                                                                                                                                                                                                                                                                                                                                                                                                                                                                                                                                                                                                                                                                                                                                                                                                                                                                                                                                                                                                                                                    |
| Vehicle | E800.1,.2,.3,.8,.9;<br>E801.0,.1,.2,.3,.8,.9;<br>E802.0,.1,.2,.3,.8,.9;<br>E803.0,.1,.2,.3,.8,.9;<br>E804.0,.1,.2,.3,.8,.9;<br>E805.0,.1,.2,.3,.8,.9;<br>E806.0,.1,.2,.3,.8,.9;<br>E807.0,.1,.2,.3,.8,.9;<br>E810.0,.1,.2,.3,.4,.5,.6,<br>.7,.8,.9;<br>E811.0,.1,.2,.3,.4,.5,.6,<br>.7,.8,.9;<br>E812.0,.1,.2,.3,.4,.5,.6,<br>.7,.8,.9;<br>E813.0,.1,.2,.3,.4,.5,.6,<br>.7,.8,.9;<br>E814.0,.1,.2,.3,.4,.5,.6,<br>.7,.8,.9;<br>E815.0,.1,.2,.3,.4,.5,.6,<br>.7,.8,.9;<br>E816.0,.1,.2,.3,.4,.5,.6,<br>.7,.8,.9;<br>E817.0,.1,.2,.3,.4,.5,.6,<br>.7,.8,.9;<br>E818.0,.1,.2,.3,.4,.5,.6,<br>.7,.8,.9;<br>E819.0,.1,.2,.3,.4,.5,.6,<br>.7,.8,.9;<br>E820.0,.1,.2,.3,.4,.5,.6, | V00.01XA,D,S; V00.02XA,D,S; V00.09XA,D,S; V00.111A,D,S; V00.112A,D,S; V00.118A,D,S; V00.121A,D,S; V00.122A,D,S; V00.128A,D,S; V00.131A,D,S; V00.132A,D,S; V00.138A,D,S; V00.141A,D,S; V00.142A,D,S; V00.148A,D,S; V00.151A,D,S; V00.152A,D,S; V00.158A,D,S; V00.181A,D,S; V00.182A,D,S; V00.188A,D,S; V00.211A,D,S; V00.212A,D,S; V00.218A,D,S; V00.221A,D,S; V00.212A,D,S; V00.228A,D,S; V00.281A,D,S; V00.282A,D,S; V00.288A,D,S; V00.311A,D,S; V00.312A,D,S; V00.318A,D,S; V00.321A,D,S; V00.322A,D,S; V00.328A,D,S; V00.381A,D,S; V00.382A,D,S; V00.388A,D,S; V00.811A,D,S; V00.812A,D,S; V00.818A,D,S; V00.821A,D,S; V00.822A,D,S; V00.828A,D,S; V00.831A,D,S; V00.832A,D,S; V00.838A,D,S; V00.891A,D,S; V00.892A,D,S; V00.898A,D,S; V01.00XA,D,S; V01.01XA,D,S; V01.02XA,D,S; V01.09XA,D,S; V01.10XA,D,S; V01.11XA,D,S; V01.12XA,D,S; V01.19XA,D,S; V01.90XA,D,S; V01.91XA,D,S; V01.92XA,D,S; V01.99XA,D,S; V02.00XA,D,S; V02.01XA,D,S; V02.02XA,D,S; V02.09XA,D,S; V02.10XA,D,S; V02.11XA,D,S; V02.12XA,D,S; V02.19XA,D,S; V02.90XA,D,S; V02.91XA,D,S; V02.92XA,D,S; V02.99XA,D,S; V03.00XA,D,S; V03.01XA,D,S; V03.02XA,D,S; V03.09XA,D,S; V03.10XA,D,S; V03.11XA,D,S; V03.12XA,D,S; V03.19XA,D,S; V03.90XA,D,S; V03.91XA,D,S; V03.92XA,D,S; V03.99XA,D,S; V04.00XA,D,S; V04.01XA,D,S; V04.02XA,D,S; V04.09XA,D,S; V04.10XA,D,S; V04.11XA,D,S; V04.12XA,D,S; V04.19XA,D,S; V04.90XA,D,S; V04.91XA,D,S; V04.92XA,D,S; V04.99XA,D,S; V05.00XA,D,S; V05.01XA,D,S; V05.02XA,D,S; V05.09XA,D,S; V05.10XA,D,S; V05.11XA,D,S; V05.12XA,D,S; V05.19XA,D,S; V05.90XA,D,S; V05.91XA,D,S; V05.92XA,D,S; V05.99XA,D,S; ; V06.00XA,D,S; V06.01XA,D,S; V06.02XA,D,S; V06.09XA,D,S; V06.10XA,D,S; V06.11XA,D,S; V06.12XA,D,S; V06.19XA,D,S; V06.90XA,D,S; V06.91XA,D,S; V06.92XA,D,S; V06.99XA,D,S; ; V09.00XA,D,S; V09.01XA,D,S; V09.02XA,D,S; V09.09XA,D,S; V09.1XXA,D,S; V09.20XA,D,S; V09.21XA,D,S; V09.29XA,D,S; V09.3XXA,D,S; V09.9XXA,D,S; V10.0XXA,D,S; V10.1XXA,D,S; V10.2XXA,D,S; V10.3XXA,D,S; V10.4XXA,D,S; V10.5XXA,D,S; V10.9XXA,D,S; V11.0XXA,D,S; V11.1XXA,D,S; V11.2XXA,D,S; V11.3XXA,D,S; V11.4XXA,D,S; V11.5XXA,D,S; V11.9XXA,D,S; V12.0XXA,D,S; V12.1XXA,D,S; V12.2XXA,D,S; V12.3XXA,D,S; V12.4XXA,D,S; V12.5XXA,D,S; V12.9XXA,D,S; V13.0XXA,D,S; V13.1XXA,D,S; V13.2XXA,D,S; V13.3XXA,D,S; V13.4XXA,D,S; V13.5XXA,D,S; V13.9XXA,D,S; V14.0XXA,D,S; V14.1XXA,D,S; V14.2XXA,D,S; V14.3XXA,D,S; V14.4XXA,D,S; V14.5XXA,D,S; V14.9XXA,D,S; V15.0XXA,D,S; V15.1XXA,D,S; V15.2XXA,D,S; V15.3XXA,D,S; V15.4XXA,D,S; V15.5XXA,D,S; |



|                                                                                                  |                                                                                                                                                                                                                                                                                                                                                                                                                                                                                                                                                                                                                                                                                                                                                                                                                                                                                                                                                                                                                                                                                                                                                                                                                                                                                                                                                                                                                                                                                                                                                                                                                                                                                                                                                                                                                                                                                                                                                                                                                                                                                                                                                                                                                                                                                                                                                                                                                                                                                                                                                                                                                                                                                                                                                                                                                                                                                                                                                                                                                                                                                                                                                                                                                                                                                                                                                                                                                                                                                                                                                                                                                                                                    |
|--------------------------------------------------------------------------------------------------|--------------------------------------------------------------------------------------------------------------------------------------------------------------------------------------------------------------------------------------------------------------------------------------------------------------------------------------------------------------------------------------------------------------------------------------------------------------------------------------------------------------------------------------------------------------------------------------------------------------------------------------------------------------------------------------------------------------------------------------------------------------------------------------------------------------------------------------------------------------------------------------------------------------------------------------------------------------------------------------------------------------------------------------------------------------------------------------------------------------------------------------------------------------------------------------------------------------------------------------------------------------------------------------------------------------------------------------------------------------------------------------------------------------------------------------------------------------------------------------------------------------------------------------------------------------------------------------------------------------------------------------------------------------------------------------------------------------------------------------------------------------------------------------------------------------------------------------------------------------------------------------------------------------------------------------------------------------------------------------------------------------------------------------------------------------------------------------------------------------------------------------------------------------------------------------------------------------------------------------------------------------------------------------------------------------------------------------------------------------------------------------------------------------------------------------------------------------------------------------------------------------------------------------------------------------------------------------------------------------------------------------------------------------------------------------------------------------------------------------------------------------------------------------------------------------------------------------------------------------------------------------------------------------------------------------------------------------------------------------------------------------------------------------------------------------------------------------------------------------------------------------------------------------------------------------------------------------------------------------------------------------------------------------------------------------------------------------------------------------------------------------------------------------------------------------------------------------------------------------------------------------------------------------------------------------------------------------------------------------------------------------------------------------------|
| <p>E844.0,.1,.2,.3,.4,.5,.6,<br/>.7,.8,.9;<br/>E845.0,.8,.9; E846.;<br/>E847.; E848.; E929.0</p> | <p>V42.9XXA,D,S; V43.01XA,D,S; V43.02XA,D,S; V43.03XA,D,S; V43.04XA,D,S; V43.11XA,D,S;<br/>V43.12XA,D,S; V43.13XA,D,S; V43.14XA,D,S; V43.21XA,D,S; V43.22XA,D,S; V43.23XA,D,S;<br/>V43.24XA,D,S; V43.31XA,D,S; V43.32XA,D,S; V43.33XA,D,S; V43.34XA,D,S; V43.41XA,D,S;<br/>V43.42XA,D,S; V43.43XA,D,S; V43.44XA,D,S; V43.51XA,D,S; V43.52XA,D,S; V43.53XA,D,S;<br/>V43.54XA,D,S; V43.61XA,D,S; V43.62XA,D,S; V43.63XA,D,S; V43.64XA,D,S; V43.71XA,D,S;<br/>V43.72XA,D,S; V43.73XA,D,S; V43.74XA,D,S; V43.91XA,D,S; V43.92XA,D,S; V43.93XA,D,S;<br/>V43.94XA,D,S; V44.0XXA,D,S; V44.1XXA,D,S; V44.2XXA,D,S; V44.3XXA,D,S; V44.4XXA,D,S;<br/>V44.5XXA,D,S; V44.6XXA,D,S; V44.7XXA,D,S; V44.9XXA,D,S; V45.0XXA,D,S; V45.1XXA,D,S;<br/>V45.2XXA,D,S; V45.3XXA,D,S; V45.4XXA,D,S; V45.5XXA,D,S; V45.6XXA,D,S; V45.7XXA,D,S;<br/>V45.9XXA,D,S; V46.0XXA,D,S; V46.1XXA,D,S; V46.2XXA,D,S; V46.3XXA,D,S; V46.4XXA,D,S;<br/>V46.5XXA,D,S; V46.6XXA,D,S; V46.7XXA,D,S; V46.9XXA,D,S; V47.0XXA,D,S; V47.01XA,D,S;<br/>V47.02XA,D,S; V47.11XA,D,S; V47.12XA,D,S; V47.1XXA,D,S; V47.2XXA,D,S; V47.31XA,D,S;<br/>V47.32XA,D,S; V47.3XXA,D,S; V47.4XXA,D,S; V47.51XA,D,S; V47.52XA,D,S; V47.5XXA,D,S;<br/>V47.61XA,D,S; V47.62XA,D,S; V47.6XXA,D,S; V47.7XXA,D,S; V47.91XA,D,S; V47.92XA,D,S;<br/>V47.9XXA,D,S; V48.0XXA,D,S; V48.1XXA,D,S; V48.2XXA,D,S; V48.3XXA,D,S; V48.4XXA,D,S;<br/>V48.5XXA,D,S; V48.6XXA,D,S; V48.7XXA,D,S; V48.9XXA,D,S; V49.00XA,D,S; V49.09XA,D,S;<br/>V49.10XA,D,S; V49.19XA,D,S; V49.20XA,D,S; V49.29XA,D,S; V49.3XXA,D,S; V49.40XA,D,S;<br/>V49.49XA,D,S; V49.50XA,D,S; V49.59XA,D,S; V49.60XA,D,S; V49.69XA,D,S; V49.81XA,D,S;<br/>V49.88XA,D,S; V49.9XXA,D,S; V50.0XXA,D,S; V50.1XXA,D,S; V50.2XXA,D,S; V50.3XXA,D,S;<br/>V50.4XXA,D,S; V50.5XXA,D,S; V50.6XXA,D,S; V50.7XXA,D,S; V50.9XXA,D,S; V51.0XXA,D,S;<br/>V51.1XXA,D,S; V51.2XXA,D,S; V51.3XXA,D,S; V51.4XXA,D,S; V51.5XXA,D,S; V51.6XXA,D,S;<br/>V51.7XXA,D,S; V51.9XXA,D,S; V52.0XXA,D,S; V52.1XXA,D,S; V52.2XXA,D,S; V52.3XXA,D,S;<br/>V52.4XXA,D,S; V52.5XXA,D,S; V52.6XXA,D,S; V52.7XXA,D,S; V52.9XXA,D,S; V53.0XXA,D,S;<br/>V53.1XXA,D,S; V53.2XXA,D,S; V53.3XXA,D,S; V53.4XXA,D,S; V53.5XXA,D,S; V53.6XXA,D,S;<br/>V53.7XXA,D,S; V53.9XXA,D,S; V54.0XXA,D,S; V54.1XXA,D,S; V54.2XXA,D,S; V54.3XXA,D,S;<br/>V54.4XXA,D,S; V54.5XXA,D,S; V54.6XXA,D,S; V54.7XXA,D,S; V54.9XXA,D,S; V55.0XXA,D,S;<br/>V55.1XXA,D,S; V55.2XXA,D,S; V55.3XXA,D,S; V55.4XXA,D,S; V55.5XXA,D,S; V55.6XXA,D,S;<br/>V55.7XXA,D,S; V55.9XXA,D,S; V56.0XXA,D,S; V56.1XXA,D,S; V56.2XXA,D,S; V56.3XXA,D,S;<br/>V56.4XXA,D,S; V56.5XXA,D,S; V56.6XXA,D,S; V56.7XXA,D,S; V56.9XXA,D,S; V57.0XXA,D,S;<br/>V57.1XXA,D,S; V57.2XXA,D,S; V57.3XXA,D,S; V57.4XXA,D,S; V57.5XXA,D,S; V57.6XXA,D,S;<br/>V57.7XXA,D,S; V57.9XXA,D,S; V58.0XXA,D,S; V58.1XXA,D,S; V58.2XXA,D,S; V58.3XXA,D,S;<br/>V58.4XXA,D,S; V58.5XXA,D,S; V58.6XXA,D,S; V58.7XXA,D,S; V58.9XXA,D,S; V59.00XA,D,S;<br/>V59.09XA,D,S; V59.10XA,D,S; V59.19XA,D,S; V59.20XA,D,S; V59.29XA,D,S; V59.3XXA,D,S;<br/>V59.40XA,D,S; V59.49XA,D,S; V59.50XA,D,S; V59.59XA,D,S; V59.60XA,D,S; V59.69XA,D,S;<br/>V59.81XA,D,S; V59.88XA,D,S; V59.9XXA,D,S; V60.0XXA,D,S; V60.1XXA,D,S; V60.2XXA,D,S;<br/>V60.3XXA,D,S; V60.4XXA,D,S; V60.5XXA,D,S; V60.6XXA,D,S; V60.7XXA,D,S; V60.9XXA,D,S;<br/>V61.0XXA,D,S; V61.1XXA,D,S; V61.2XXA,D,S; V61.3XXA,D,S; V61.4XXA,D,S; V61.5XXA,D,S;<br/>V61.6XXA,D,S; V61.7XXA,D,S; V61.9XXA,D,S; V62.0XXA,D,S; V62.1XXA,D,S; V62.2XXA,D,S;<br/>V62.3XXA,D,S; V62.4XXA,D,S; V62.5XXA,D,S; V62.6XXA,D,S; V62.7XXA,D,S; V62.9XXA,D,S;<br/>V63.0XXA,D,S; V63.1XXA,D,S; V63.2XXA,D,S; V63.3XXA,D,S; V63.4XXA,D,S; V63.5XXA,D,S;</p> |
|--------------------------------------------------------------------------------------------------|--------------------------------------------------------------------------------------------------------------------------------------------------------------------------------------------------------------------------------------------------------------------------------------------------------------------------------------------------------------------------------------------------------------------------------------------------------------------------------------------------------------------------------------------------------------------------------------------------------------------------------------------------------------------------------------------------------------------------------------------------------------------------------------------------------------------------------------------------------------------------------------------------------------------------------------------------------------------------------------------------------------------------------------------------------------------------------------------------------------------------------------------------------------------------------------------------------------------------------------------------------------------------------------------------------------------------------------------------------------------------------------------------------------------------------------------------------------------------------------------------------------------------------------------------------------------------------------------------------------------------------------------------------------------------------------------------------------------------------------------------------------------------------------------------------------------------------------------------------------------------------------------------------------------------------------------------------------------------------------------------------------------------------------------------------------------------------------------------------------------------------------------------------------------------------------------------------------------------------------------------------------------------------------------------------------------------------------------------------------------------------------------------------------------------------------------------------------------------------------------------------------------------------------------------------------------------------------------------------------------------------------------------------------------------------------------------------------------------------------------------------------------------------------------------------------------------------------------------------------------------------------------------------------------------------------------------------------------------------------------------------------------------------------------------------------------------------------------------------------------------------------------------------------------------------------------------------------------------------------------------------------------------------------------------------------------------------------------------------------------------------------------------------------------------------------------------------------------------------------------------------------------------------------------------------------------------------------------------------------------------------------------------------------------|

V63.6XXA,D,S; V63.7XXA,D,S; V63.9XXA,D,S; V64.0XXA,D,S; V64.1XXA,D,S; V64.2XXA,D,S;  
V64.3XXA,D,S; V64.4XXA,D,S; V64.5XXA,D,S; V64.6XXA,D,S; V64.7XXA,D,S; V64.9XXA,D,S;  
V65.0XXA,D,S; V65.1XXA,D,S; V65.2XXA,D,S; V65.3XXA,D,S; V65.4XXA,D,S; V65.5XXA,D,S;  
V65.6XXA,D,S; V65.7XXA,D,S; V65.9XXA,D,S; V66.0XXA,D,S; V66.1XXA,D,S; V66.2XXA,D,S;  
V66.3XXA,D,S; V66.4XXA,D,S; V66.5XXA,D,S; V66.6XXA,D,S; V66.7XXA,D,S; V66.9XXA,D,S;  
V67.0XXA,D,S; V67.1XXA,D,S; V67.2XXA,D,S; V67.3XXA,D,S; V67.4XXA,D,S; V67.5XXA,D,S;  
V67.6XXA,D,S; V67.7XXA,D,S; V67.9XXA,D,S; V68.0XXA,D,S; V68.1XXA,D,S; V68.2XXA,D,S;  
V68.3XXA,D,S; V68.4XXA,D,S; V68.5XXA,D,S; V68.6XXA,D,S; V68.7XXA,D,S; V68.9XXA,D,S;  
V69.00XA,D,S; V69.09XA,D,S; V69.10XA,D,S; V69.19XA,D,S; V69.20XA,D,S; V69.3XXA,D,S;  
V69.40XA,D,S; V69.49XA,D,S; V69.50XA,D,S; V69.59XA,D,S; V69.60XA,D,S; V69.69XA,D,S;  
V69.81XA,D,S; V69.88XA,D,S; V69.9XXA,D,S; V70.0XXA,D,S; V70.1XXA,D,S; V70.2XXA,D,S;  
V70.3XXA,D,S; V70.4XXA,D,S; V70.5XXA,D,S; V70.6XXA,D,S; V70.7XXA,D,S; V70.9XXA,D,S;  
V71.0XXA,D,S; V71.1XXA,D,S; V71.2XXA,D,S; V71.3XXA,D,S; V71.4XXA,D,S; V71.5XXA,D,S;  
V71.6XXA,D,S; V71.7XXA,D,S; V71.9XXA,D,S; V72.0XXA,D,S; V72.1XXA,D,S; V72.2XXA,D,S;  
V72.3XXA,D,S; V72.4XXA,D,S; V72.5XXA,D,S; V72.6XXA,D,S; V72.7XXA,D,S; V72.9XXA,D,S;  
V73.0XXA,D,S; V73.1XXA,D,S; V73.2XXA,D,S; V73.3XXA,D,S; V73.4XXA,D,S; V73.5XXA,D,S;  
V73.6XXA,D,S; V73.7XXA,D,S; V73.9XXA,D,S; V74.0XXA,D,S; V74.1XXA,D,S; V74.2XXA,D,S;  
V74.3XXA,D,S; V74.4XXA,D,S; V74.5XXA,D,S; V74.6XXA,D,S; V74.7XXA,D,S; V74.9XXA,D,S;  
V75.0XXA,D,S; V75.1XXA,D,S; V75.2XXA,D,S; V75.3XXA,D,S; V75.4XXA,D,S; V75.5XXA,D,S;  
V75.6XXA,D,S; V75.7XXA,D,S; V75.9XXA,D,S; V76.0XXA,D,S; V76.1XXA,D,S; V76.2XXA,D,S;  
V76.3XXA,D,S; V76.4XXA,D,S; V76.5XXA,D,S; V76.6XXA,D,S; V76.7XXA,D,S; V76.9XXA,D,S;  
V77.0XXA,D,S; V77.1XXA,D,S; V77.2XXA,D,S; V77.3XXA,D,S; V77.4XXA,D,S; V77.5XXA,D,S;  
V77.6XXA,D,S; V77.7XXA,D,S; V77.9XXA,D,S; V78.0XXA,D,S; V78.1XXA,D,S; V78.2XXA,D,S;  
V78.3XXA,D,S; V78.4XXA,D,S; V78.5XXA,D,S; V78.6XXA,D,S; V78.7XXA,D,S; V78.9XXA,D,S;  
V79.00XA,D,S; V79.10XA,D,S; V79.19XA,D,S; V79.20XA,D,S; V79.29XA,D,S; V79.3XXA,D,S;  
V79.40XA,D,S; V79.49XA,D,S; V79.50XA,D,S; V79.59XA,D,S; V79.60XA,D,S; V79.69XA,D,S;  
V79.81XA,D,S; V79.88XA,D,S; V79.9XXA,D,S; V80.010A,D,S; V80.020A,D,S; V80.11XA,D,S;  
V80.12XA,D,S; V80.21XA,D,S; V80.22XA,D,S; V80.31XA,D,S; V80.32XA,D,S; V80.41XA,D,S;  
V80.42XA,D,S; V80.51XA,D,S; V80.52XA,D,S; V80.61XA,D,S; V80.62XA,D,S; V80.710A,D,S;  
V80.711A,D,S; V80.720A,D,S; V80.721A,D,S; V80.730A,D,S; V80.731A,D,S; V80.790A,D,S;  
V80.791A,D,S; V80.81XA,D,S; V80.82XA,D,S; V80.910A,D,S; V80.918A,D,S; V80.919A,D,S;  
V80.919A,D,S; V80.920A,D,S; V80.928A,D,S; V80.929A,D,S; V81.0XXA,D,S; V81.1XXA,D,S;  
V81.2XXA,D,S; V81.3XXA,D,S; V81.4XXA,D,S; V81.5XXA,D,S; V81.6XXA,D,S; V81.7XXA,D,S;  
V81.81XA,D,S; V81.82XA,D,S; V81.83XA,D,S; V81.89XA,D,S; V81.9XXA,D,S; V82.0XXA,D,S;  
V82.1XXA,D,S; V82.2XXA,D,S; V82.3XXA,D,S; V82.4XXA,D,S; V82.5XXA,D,S; V82.6XXA,D,S;  
V82.7XXA,D,S; V82.8XXA,D,S; V82.9XXA,D,S; V83.0XXA,D,S; V83.1XXA,D,S; V83.2XXA,D,S;  
V83.3XXA,D,S; V83.4XXA,D,S; V83.5XXA,D,S; V83.6XXA,D,S; V83.7XXA,D,S; V83.9XXA,D,S;  
V84.0XXA,D,S; V84.1XXA,D,S; V84.2XXA,D,S; V84.3XXA,D,S; V84.4XXA,D,S; V84.5XXA,D,S;  
V84.6XXA,D,S; V84.7XXA,D,S; V84.9XXA,D,S; V85.0XXA,D,S; V85.1XXA,D,S; V85.2XXA,D,S;  
V85.3XXA,D,S; V85.4XXA,D,S; V85.5XXA,D,S; V85.6XXA,D,S; V85.7XXA,D,S; V85.8XXA,D,S;

V85.9XXA,D,S; V86.01XA,D,S; V86.02XA,D,S; V86.03XA,D,S; V86.04XA,D,S; V86.09XA,D,S;  
V86.11XA,D,S; V86.12XA,D,S; V86.13XA,D,S; V86.14XA,D,S; V86.19XA,D,S; V86.21XA,D,S;  
V86.22XA,D,S;V86.23XA,D,S; V86.24XA,D,S; V86.29XA,D,S; V86.31XA,D,S; V86.32XA,D,S;  
V86.33XA,D,S; V86.34XA,D,S; V86.39XA,D,S; V86.41XA,D,S; V86.42XA,D,S; V86.43XA,D,S;  
V86.44XA,D,S; V86.49XA,D,S; V86.51XA,D,S; V86.52XA,D,S; V86.53XA,D,S; V86.54XA,D,S;  
V86.59XA,D,S; V86.61XA,D,S; V86.62XA,D,S; V86.63XA,D,S; V86.64XA,D,S; V86.69XA,D,S;  
V86.71XA,D,S; V86.72XA,D,S; V86.73XA,D,S; V86.74XA,D,S; V86.79XA,D,S; V86.91XA,D,S;  
V86.92XA,D,S; V86.93XA,D,S; V86.94XA,D,S; V86.99XA,D,S; V87.0XXA,D,S; V87.1XXA,D,S;  
V87.2XXA,D,S; V87.3XXA,D,S; V87.4XXA,D,S; V87.5XXA,D,S; V87.6XXA,D,S; V87.7XXA,D,S;  
V87.8XXA,D,S; V87.9XXA,D,S; V88.0XXA,D,S; V88.1XXA,D,S; V88.2XXA,D,S; V88.3XXA,D,S;  
V88.4XXA,D,S; V88.5XXA,D,S; V88.6XXA,D,S; V88.7XXA,D,S; V88.8XXA,D,S; V88.9XXA,D,S;  
V89.0XXA,D,S; V89.1XXA,D,S; V89.2XXA,D,S; V89.3XXA,D,S; V89.9XXA,D,S; V90.00XA,D,S;  
V90.01XA,D,S; V90.02XA,D,S; V90.03XA,D,S; V90.04XA,D,S; V90.05XA,D,S; V90.06XA,D,S;  
V90.08XA,D,S; V90.09XA,D,S; V90.10XA,D,S; V90.11XA,D,S; V90.12XA,D,S; V90.13XA,D,S;  
V90.14XA,D,S; V90.15XA,D,S; V90.16XA,D,S; V90.18XA,D,S; V90.19XA,D,S; V90.20XA,D,S;  
V90.21XA,D,S; V90.22XA,D,S; V90.23XA,D,S; V90.24XA,D,S; V90.25XA,D,S;V90.26XA,D,S;  
V90.27XA,D,S; V90.28XA,D,S; V90.29XA,D,S; V90.30XA,D,S; V90.31XA,D,S; V90.32XA,D,S;  
V90.33XA,D,S; V90.34XA,D,S; V90.35XA,D,S; V90.36XA,D,S; V90.37XA,D,S; V90.38XA,D,S;  
V90.39XA,D,S; V90.80XA,D,S; V90.81XA,D,S; V90.82XA,D,S; V90.83XA,D,S; V90.84XA,D,S;  
V90.85XA,D,S; V90.86XA,D,S; V90.87XA,D,S; V90.88XA,D,S; V90.89XA,D,S; V91.00XA,D,S;  
V91.01XA,D,S; V91.02XA,D,S; V91.03XA,D,S; V91.04XA,D,S; V91.05XA,D,S; V91.06XA,D,S;  
V91.07XA,D,S; V91.08XA,D,S; V91.09XA,D,S; V91.10XA,D,S; V91.11XA,D,S; V91.12XA,D,S;  
V91.13XA,D,S; V91.14XA,D,S; V91.15XA,D,S; V91.16XA,D,S; V91.18XA,D,S; V91.19XA,D,S;  
V91.20XA,D,S; V91.21XA,D,S; V91.22XA,D,S; V91.24XA,D,S; V91.25XA,D,S; V91.26XA,D,S;  
V91.29XA,D,S; V91.30XA,D,S; V91.31XA,D,S; V91.32XA,D,S; V91.33XA,D,S; V91.34XA,D,S;  
V91.35XA,D,S; V91.36XA,D,S; V91.37XA,D,S; V91.38XA,D,S; V91.39XA,D,S; V91.80XA,D,S;  
V91.81XA,D,S; V91.82XA,D,S; V91.83XA,D,S; V91.84XA,D,S; V91.85XA,D,S; V91.86XA,D,S;  
V91.87XA,D,S; V91.88XA,D,S; V91.89XA,D,S; V92.00XA,D,S; V92.01XA,D,S; V92.02XA,D,S;  
V92.03XA,D,S; V92.04XA,D,S; V92.05XA,D,S; V92.06XA,D,S; V92.07XA,D,S; V92.08XA,D,S;  
V92.09XA,D,S; V92.10XA,D,S; V92.11XA,D,S; V92.12XA,D,S; V92.13XA,D,S; V92.14XA,D,S;  
V92.15XA,D,S; V92.16XA,D,S; V92.19XA,D,S; V92.20XA,D,S; V92.21XA,D,S; V92.22XA,D,S;  
V92.23XA,D,S; V92.24XA,D,S; V92.25XA,D,S; V92.26XA,D,S; V92.27XA,D,S; V92.28XA,D,S;  
V92.29XA,D,S; V93.00XA,D,S; V93.01XA,D,S; V93.02XA,D,S; V93.03XA,D,S; V93.04XA,D,S;  
V93.09XA,D,S; V93.10XA,D,S; V93.11XA,D,S; V93.12XA,D,S; V93.13XA,D,S; V93.14XA,D,S;  
V93.19XA,D,S; V93.20XA,D,S; V93.21XA,D,S; V93.22XA,D,S; V93.23XA,D,S; V93.24XA,D,S;  
V93.29XA,D,S; V93.30XA,D,S; V93.31XA,D,S; V93.32XA,D,S; V93.33XA,D,S; V93.34XA,D,S;  
V93.35XA,D,S; V93.36XA,D,S; V93.37XA,D,S; V93.38XA,D,S; V93.40XA,D,S; V93.41XA,D,S;  
V93.42XA,D,S;V93.43XA,D,S; V93.44XA,D,S; V93.48XA,D,S; V93.49XA,D,S; V93.50XA,D,S;  
V93.51XA,D,S; V93.52XA,D,S; V93.53XA,D,S; V93.54XA,D,S; V93.59XA,D,S; V93.60XA,D,S;  
V93.61XA,D,S; V93.62XA,D,S; V93.63XA,D,S; V93.64XA,D,S; V93.69XA,D,S; V93.80XA,D,S;

|                    |                                                                                                                                                                                                                                                                                                                             |                                                                                                                                                                                                                                                                                                                                                                                                                                                                                                                                                                                                                                                                                                                                                                                                                                                                                                                                                                                                                                                                                                                                                                                                                                                                                                                                                                                                                                                                     |
|--------------------|-----------------------------------------------------------------------------------------------------------------------------------------------------------------------------------------------------------------------------------------------------------------------------------------------------------------------------|---------------------------------------------------------------------------------------------------------------------------------------------------------------------------------------------------------------------------------------------------------------------------------------------------------------------------------------------------------------------------------------------------------------------------------------------------------------------------------------------------------------------------------------------------------------------------------------------------------------------------------------------------------------------------------------------------------------------------------------------------------------------------------------------------------------------------------------------------------------------------------------------------------------------------------------------------------------------------------------------------------------------------------------------------------------------------------------------------------------------------------------------------------------------------------------------------------------------------------------------------------------------------------------------------------------------------------------------------------------------------------------------------------------------------------------------------------------------|
|                    |                                                                                                                                                                                                                                                                                                                             | V93.81XA,D,S; V93.82XA,D,S; V93.83XA,D,S;V93.84XA,D,S; V93.85XA,D,S; V93.86XA,D,S; V93.87XA,D,S; V93.88XA,D,S; V93.89XA,D,S; V94.0XXA,D,S; V94.11XA,D,S; V94.12XA,D,S; V94.21XA,D,S; V94.22XA,D,S; V94.31XA,D,S; V94.32XA,D,S; V94.4XXA,D,S; V94.810A,D,S; V94.811A,D,S; V94.818A,D,S; V94.89XA,D,S; V94.9XXA,D,S; V95.00XA,D,S; V95.01XA,D,S; V95.02XA,D,S; V95.03XA,D,S; V95.04XA,D,S; V95.05XA,D,S; V95.09XA,D,S; V95.10XA,D,S; V95.11XA,D,S; V95.12XA,D,S; V95.13XA,D,S; V95.14XA,D,S; V95.15XA,D,S; V95.19XA,D,S; V95.20XA,D,S; V95.21XA,D,S; V95.22XA,D,S; V95.23XA,D,S; V95.24XA,D,S; V95.25XA,D,S; V95.29XA,D,S; V95.30XA,D,S; V95.31XA,D,S; V95.32XA,D,S; V95.33XA,D,S; V95.34XA,D,S; V95.35XA,D,S; V95.39XA,D,S; V95.40XA,D,S; V95.41XA,D,S; V95.42XA,D,S; V95.43XA,D,S; V95.44XA,D,S; V95.45XA,D,S; V95.49XA,D,S; V95.8XXA,D,S; V95.9XXA,D,S; V96.00XA,D,S; V96.01XA,D,S; V96.02XA,D,S; V96.03XA,D,S; V96.04XA,D,S; V96.05XA,D,S; V96.09XA,D,S; V96.10XA,D,S; V96.11XA,D,S; V96.12XA,D,S; V96.13XA,D,S; V96.14XA,D,S; V96.15XA,D,S; V96.19XA,D,S; V96.20XA,D,S; V96.21XA,D,S; V96.22XA,D,S; V96.23XA,D,S; V96.24XA,D,S; V96.25XA,D,S; V96.29XA,D,S; V96.8XXA,D,S; V96.9XXA,D,S; V97.0XXA,D,S; V97.1XXA,D,S; V97.21XA,D,S; V97.22XA,D,S; V97.29XA,D,S; V97.31XA,D,S; V97.32XA,D,S; V97.33XA,D,S; V97.39XA,D,S; V97.810A,D,S; V97.811A,D,S; V97.818A,D,S; V97.89XA,D,S; V98.0XXA,D,S; V98.1XXA,D,S; V98.2XXA,D,S; V98.3XXA,D,S; V98.8XXA,D,S; V99.XXXA,D,S |
| Sedative Poisoning | 967.0,.8; 968.0; 969.1,.2,.3,.4,.5; E851.; E852.0,.1,.2,.3,.4,.5,.8,.9; E853.0,.1,.2,.8,.9; E937.0,.8; E938.0; E939.1,.2,.4,.5; E980.1,.2,.3                                                                                                                                                                                | T41.0X1A,D,S; T41.0X2A,D,S; T41.0X3A,D,S; T41.0X4A,D,S; T41.0X5A,D,S; T41.1X1A,D,S; T41.1X2A,D,S; T41.1X3A,D,S; T41.1X4A,D,S; T41.1X5A,D,S; T41.201A,D,S; T41.202A,D,S; T41.203A,D,S; T41.204A,D,S; T41.205A,D,S; T41.291A,D,S; T41.292A,D,S; T41.293A,D,S; T41.294A,D,S; T41.295A,D,S; T41.3X1A,D,S; T41.3X2A,D,S; T41.3X3A,D,S; T41.3X4A,D,S; T41.3X5A,D,S; T41.41XA,D,S; T41.42XA,D,S; T41.43XA,D,S; T41.44XA,D,S; T41.45XA,D,S; T42.3X1A,D,S; T42.3X2A,D,S; T42.3X3A,D,S; T42.3X4A,D,S; T42.3X5A,D,S; T42.4X1A,D,S; T42.4X2A,D,S; T42.4X3A,D,S; T42.4X4A,D,S; T42.4X5A,D,S; T42.6X1A,D,S; T42.6X2A,D,S; T42.6X3A,D,S; T42.6X4A,D,S; T42.6X5A,D,S; T42.8X1A,D,S; T42.8X2A,D,S; T42.8X3A,D,S; T42.8X4A,D,S; T42.8X5A,D,S; T43.3X1A,D,S; T43.3X2A,D,S; T43.3X3A,D,S; T43.3X4A,D,S; T43.3X5A,D,S; T43.4X1A,D,S; T43.4X2A,D,S; T43.4X3A,D,S; T43.4X4A,D,S; T43.4X5A,D,S; T43.501A,D,S; T43.502A,D,S; T43.503A,D,S; T43.504A,D,S; T43.505A,D,S; T43.591A,D,S; T43.592A,D,S; T43.593A,D,S; T43.594A,D,S; T43.595A,D,S                                                                                                                                                                                                                                                                                                                                                                                                                                                  |
| Suicide-related    | E950.0,.01,.02,.1,.11,.12,.2,.21,.22,.3,.31,.32,.4,.41,.42,.5,.51,.52,.6,.61,.62,.7,.71,.72,.8,.81,.82,.9,.91,.92; E951.0,.01,.02,.1,.11,.12,.8,.81,.82; E952.0,.01,.02,.1,.11,.12,.8,.81,.82,.9,.91,.92; E953.0,.01,.02,.1,.11,.12,.2,.21,.22,.3,.31,.32,.4,.41,.42,.5,.51,.52,.6,.61,.62,.7,.71,.72,.8,.81,.82,.9,.91,.92 | R45.851; T14.91; T36.0X2A,D,S; T36.1X2A,D,S; T36.2X2A,D,S; T36.3X2A,D,S; T36.4X2A,D,S; T36.5X2A,D,S; T36.6X2A,D,S; T36.7X2A,D,S; T36.8X2A,D,S; T36.92XA,D,S; T37.0X2A,D,S; T37.1X2A,D,S; T37.2X2A,D,S; T37.3X2A,D,S; T37.4X2A,D,S; T37.5X2A,D,S; T37.8X2A,D,S; T37.92XA,D,S; T38.0X2A,D,S; T38.1X2A,D,S; T38.2X2A,D,S; T38.3X2A,D,S; T38.4X2A,D,S; T38.5X2A,D,S; T38.6X2A,D,S; T38.7X2A,D,S; T38.802A,D,S; T38.812A,D,S; T38.892A,D,S; T38.902A,D,S; T38.992A,D,S; T39.012A,D,S; T39.092A,D,S; T39.1X2A,D,S; T39.2X2A,D,S; T39.312A,D,S; T39.392A,D,S; T39.4X2A,D,S; T39.8X2A,D,S; T39.92XA,D,S; T40.0X2A,D,S; T40.1X2A,D,S; T40.2X2A,D,S; T40.3X2A,D,S; T40.4X2A,D,S; T40.5X2A,D,S; T40.602A,D,S; T40.692A,D,S; T40.7X2A,D,S; T40.8X2A,D,S; T40.902A,D,S; T40.992A,D,S; T41.0X2A,D,S; T41.1X2A,D,S; T41.202A,D,S; T41.292A,D,S; T41.3X2A,D,S; T41.42XA,D,S; T41.5X2A,D,S; T42.0X2A,D,S; T42.1X2A,D,S; T42.2X2A,D,S; T42.3X2A,D,S; T42.4X2A,D,S; T42.5X2A,D,S;                                                                                                                                                                                                                                                                                                                                                                                                                                                                                                      |

|                                                                                                                                                                                                                                                                                                                                                                                                                                                                                                                            |                                                                                                                                                                                                                                                                                                                                                                                                                                                                                                                                                                                                                                                                                                                                                                                                                                                                                                                                                                                                                                                                                                                                                                                                                                                                                                                                                                                                                                                                                                                                                                                                                                                                                                                                                                                                                                                                                                                                                                                                                                                                                                                                                                                                                                                                                                                                                                                                                                                                                                                                                                                                                                                                                                                                                                                                                                                                                                                                                                                                                                                                                                                                                                                                                                                                                                                                                                                                                                                                                                                                                                                                                                                                                                           |
|----------------------------------------------------------------------------------------------------------------------------------------------------------------------------------------------------------------------------------------------------------------------------------------------------------------------------------------------------------------------------------------------------------------------------------------------------------------------------------------------------------------------------|-----------------------------------------------------------------------------------------------------------------------------------------------------------------------------------------------------------------------------------------------------------------------------------------------------------------------------------------------------------------------------------------------------------------------------------------------------------------------------------------------------------------------------------------------------------------------------------------------------------------------------------------------------------------------------------------------------------------------------------------------------------------------------------------------------------------------------------------------------------------------------------------------------------------------------------------------------------------------------------------------------------------------------------------------------------------------------------------------------------------------------------------------------------------------------------------------------------------------------------------------------------------------------------------------------------------------------------------------------------------------------------------------------------------------------------------------------------------------------------------------------------------------------------------------------------------------------------------------------------------------------------------------------------------------------------------------------------------------------------------------------------------------------------------------------------------------------------------------------------------------------------------------------------------------------------------------------------------------------------------------------------------------------------------------------------------------------------------------------------------------------------------------------------------------------------------------------------------------------------------------------------------------------------------------------------------------------------------------------------------------------------------------------------------------------------------------------------------------------------------------------------------------------------------------------------------------------------------------------------------------------------------------------------------------------------------------------------------------------------------------------------------------------------------------------------------------------------------------------------------------------------------------------------------------------------------------------------------------------------------------------------------------------------------------------------------------------------------------------------------------------------------------------------------------------------------------------------------------------------------------------------------------------------------------------------------------------------------------------------------------------------------------------------------------------------------------------------------------------------------------------------------------------------------------------------------------------------------------------------------------------------------------------------------------------------------------------------|
| <p>12,.8,.81,.82,.9;<br/> E954,.1,.2;<br/> E955.0,.01,.02,.1,.11,.<br/> 12,.2,.21,.22,.3,.31..32<br/> ,.4,.41,.42,.5,.51,.52,.6<br/> ,.7,.9; E956,.1,.2;<br/> E957.0,.01,.02,.1,.11,.<br/> 12,.2,.21,.22,.9,.91,.92<br/> ;<br/> E958.0,.01;.02,.1,.11,.<br/> 12,.2,.21,.22,.3,.31,.32<br/> ,.4,.41,.42,.5,.51,.52,.6<br/> ,.61,.62,.7,.71,.72,.8,.8<br/> 1,.82,.9; E959.;;<br/> E980.6,.8;<br/> E981.0,.1,.8;<br/> E982.0,.1,.8,.9;<br/> E983.0,.1,.8,.9; E984.;;<br/> E988.0,.1,.2,.3,.4,.5,.6,<br/> .7,.8,.9; V62.84</p> | <p>T42.6X2A,D,S; T42.72XA,D,S; T42.8X2A,D,S; T43.012A,D,S; T43.022A,D,S; T43.1X2A,D,S;<br/> T43.202A,D,S; T43.212A,D,S; T43.222A,D,S; T43.292A,D,S; T43.3X2A,D,S; T43.4X2A,D,S;<br/> T43.502A,D,S; T43.592A,D,S; T43.602A,D,S; T43.612A,D,S; T43.622A,D,S; T43.632A,D,S;<br/> T43.692A,D,S; T43.8X2A,D,S; T43.92XA,D,S; T44.0X2A,D,S; T44.1X2A,D,S; T44.2X2A,D,S;<br/> T44.3X2A,D,S; T44.4X2A,D,S; T44.5X2A,D,S; T44.6X2A,D,S; T44.7X2A,D,S; T44.8X2A,D,S;<br/> T44.902A,D,S; T44.992A,D,S; T45.0X2A,D,S; T45.1X2A,D,S; T45.2X2A,D,S; T45.3X2A,D,S;<br/> T45.4X2A,D,S; T45.512A,D,S; T45.522A,D,S; T45.602A,D,S; T45.612A,D,S; T45.622A,D,S;<br/> T45.692A,D,S; T45.7X2A,D,S; T45.8X2A,D,S; T45.92XA,D,S; T46.0X2A,D,S; T46.1X2A,D,S;<br/> T46.2X2A,D,S; T46.3X2A,D,S; T46.4X2A,D,S; T46.5X2A,D,S; T46.6X2A,D,S; T46.7X2A,D,S;<br/> T46.8X2A,D,S; T46.902A,D,S; T46.992A,D,S; T47.0X2A,D,S; T47.1X2A,D,S; T47.2X2A,D,S;<br/> T47.3X2A,D,S; T47.4X2A,D,S; T47.5X2A,D,S; T47.6X2A,D,S; T47.7X2A,D,S; T47.8X2A,D,S;<br/> T47.92XA,D,S; T48.0X2A,D,S; T48.1X2A,D,S; T48.202A,D,S; T48.292A,D,S; T48.3X2A,D,S;<br/> T48.4X2A,D,S; T48.5X2A,D,S; T48.6X2A,D,S; T48.902A,D,S; T48.992A,D,S; T49.0X2A,D,S;<br/> T49.1X2A,D,S; T49.2X2A,D,S; T49.3X2A,D,S; T49.4X2A,D,S; T49.5X2A,D,S; T49.6X2A,D,S;<br/> T49.7X2A,D,S; T49.8X2A,D,S; T49.92XA,D,S; T50.0X2A,D,S; T50.1X2A,D,S; T50.2X2A,D,S;<br/> T50.3X2A,D,S; T50.4X2A,D,S; T50.5X2A,D,S; T50.6X2A,D,S; T50.7X2A,D,S; T50.8X2A,D,S;<br/> T50.902A,D,S; T50.902S,D,S; T50.992A,D,S; T50.A12A,D,S; T50.A12A,D,S; T50.A22A,D,S;<br/> T50.A92A,D,S; T50.B12A,D,S; T50.B92A,D,S; T50.Z12A,D,S; T50.Z92A,D,S; T51.0X2A,D,S;<br/> T51.1X2A,D,S; T51.2X2A,D,S; T51.3X2A,D,S; T51.8X2A,D,S; T51.92XA,D,S; T52.0X2A,D,S;<br/> T52.1X2A,D,S; T52.2X2A,D,S; T52.3X2A,D,S; T52.4X2A,D,S; T52.8X2A,D,S; T52.92XA,D,S;<br/> T53.0X2A,D,S; T53.1X2A,D,S; T53.2X2A,D,S; T53.3X2A,D,S; T53.4X2A,D,S; T53.5X2A,D,S;<br/> T53.6X2A,D,S; T53.7X2A,D,S; T53.92XA,D,S; T54.0X2A,D,S; T54.1X2A,D,S; T54.2X2A,D,S;<br/> T54.3X2A,D,S; T54.92XA,D,S; T55.0X2A,D,S; T55.1X2A,D,S; T56.0X2A,D,S; T56.1X2A,D,S;<br/> T56.2X2A,D,S; T56.3X2A,D,S; T56.4X2A,D,S; T56.5X2A,D,S; T56.6X2A,D,S; T56.7X2A,D,S;<br/> T56.812A,D,S; T56.892A,D,S; T56.92XA,D,S; T57.0X2A,D,S; T57.1X2A,D,S; T57.2X2A,D,S;<br/> T57.3X2A,D,S; T57.8X2A,D,S; T57.92XA,D,S; T58.02XA,D,S; T58.12XA,D,S; T58.2X2A,D,S;<br/> T58.8X2A,D,S; T58.92XA,D,S; T59.0X2A,D,S; T59.1X2A,D,S; T59.2X2A,D,S; T59.3X2A,D,S;<br/> T59.4X2A,D,S; T59.5X2A,D,S; T59.6X2A,D,S; T59.7X2A,D,S; T59.812A,D,S; T59.892A,D,S;<br/> T59.92XA,D,S; T60.0X2A,D,S; T60.1X2A,D,S; T60.2X2A,D,S; T60.3X2A,D,S; T60.4X2A,D,S;<br/> T60.8X2A,D,S; T60.92XA,D,S; T61.02XA,D,S; T61.12XA,D,S; T61.772A,D,S; T61.782A,D,S;<br/> T61.8X2A,D,S; T61.92XA,D,S; T62.0X2A,D,S; T62.1X2A,D,S; T62.2X2A,D,S; T62.8X2A,D,S;<br/> T62.92XA,D,S; T63.002A,D,S; T63.012A,D,S; T63.022A,D,S; T63.032A,D,S; T63.042A,D,S;<br/> T63.062A,D,S; T63.072A,D,S; T63.082A,D,S; T63.092A,D,S; T63.112A,D,S; T63.122A,D,S;<br/> T63.192A,D,S; T63.2X2A,D,S; T63.302A,D,S; T63.312A,D,S; T63.322A,D,S; T63.332A,D,S;<br/> T63.392A,D,S; T63.412A,D,S; T63.422A,D,S; T63.432A,D,S; T63.442A,D,S; T63.452A,D,S;<br/> T63.462A,D,S; T63.482A,D,S; T63.512A,D,S; T63.592A,D,S; T63.612A,D,S; T63.622A,D,S;<br/> T63.632A,D,S; T63.692A,D,S; T63.712A,D,S; T63.792A,D,S; T63.812A,D,S; T63.822A,D,S;<br/> T63.832A,D,S; T63.892A,D,S; T63.92XA,D,S; T64.02XA,D,S; T64.82XA,D,S; T65.0X2A,D,S;<br/> T65.1X2A,D,S; T65.212A,D,S; T65.222A,D,S; T65.292A,D,S; T65.3X2A,D,S; T65.4X2A,D,S;<br/> T65.5X2A,D,S; T65.6X2A,D,S; T65.812A,D,S; T65.822A,D,S; T65.832A,D,S; T65.892A,D,S;</p> |
|----------------------------------------------------------------------------------------------------------------------------------------------------------------------------------------------------------------------------------------------------------------------------------------------------------------------------------------------------------------------------------------------------------------------------------------------------------------------------------------------------------------------------|-----------------------------------------------------------------------------------------------------------------------------------------------------------------------------------------------------------------------------------------------------------------------------------------------------------------------------------------------------------------------------------------------------------------------------------------------------------------------------------------------------------------------------------------------------------------------------------------------------------------------------------------------------------------------------------------------------------------------------------------------------------------------------------------------------------------------------------------------------------------------------------------------------------------------------------------------------------------------------------------------------------------------------------------------------------------------------------------------------------------------------------------------------------------------------------------------------------------------------------------------------------------------------------------------------------------------------------------------------------------------------------------------------------------------------------------------------------------------------------------------------------------------------------------------------------------------------------------------------------------------------------------------------------------------------------------------------------------------------------------------------------------------------------------------------------------------------------------------------------------------------------------------------------------------------------------------------------------------------------------------------------------------------------------------------------------------------------------------------------------------------------------------------------------------------------------------------------------------------------------------------------------------------------------------------------------------------------------------------------------------------------------------------------------------------------------------------------------------------------------------------------------------------------------------------------------------------------------------------------------------------------------------------------------------------------------------------------------------------------------------------------------------------------------------------------------------------------------------------------------------------------------------------------------------------------------------------------------------------------------------------------------------------------------------------------------------------------------------------------------------------------------------------------------------------------------------------------------------------------------------------------------------------------------------------------------------------------------------------------------------------------------------------------------------------------------------------------------------------------------------------------------------------------------------------------------------------------------------------------------------------------------------------------------------------------------------------------|



|  |  |                                                                                                                                                                                                                                                                                                                                                                                                                                                                                                                                                                                                                                                                                                                                                                                |
|--|--|--------------------------------------------------------------------------------------------------------------------------------------------------------------------------------------------------------------------------------------------------------------------------------------------------------------------------------------------------------------------------------------------------------------------------------------------------------------------------------------------------------------------------------------------------------------------------------------------------------------------------------------------------------------------------------------------------------------------------------------------------------------------------------|
|  |  | T65.92XA,D,S; T71.112A,D,S; T71.122A,D,S; T71.132A,D,S; T71.152A,D,S; T71.162A,D,S;<br>T71.192A,D,S; T71.222A,D,S; T71.232A,D,S; X71.0XXA,D,S; X71.1XXA,D,S; X71.2XXA,D,S;<br>X71.3XXA,D,S; X71.8XXA,D,S; X71.9XXA,D,S; X72.XXXA,D,S; X73.0XXA,D,S; X73.1XXA,D,S;<br>X73.2XXA,D,S; X73.8XXA,D,S; X73.9XXA,D,S; X74.01XA,D,S; X74.02XA,D,S; X74.09XA,D,S;<br>X74.8XXA,D,S; X74.9XXA,D,S; X75.XXXA,D,S; X76.XXXA,D,S; X77.0XXA,D,S; X77.1XXA,D,S;<br>X77.2XXA,D,S; X77.3XXA,D,S; X77.8XXA,D,S; X77.9XXA,D,S; X78.0XXA,D,S; X78.1XXA,D,S;<br>X78.2XXA,D,S; X78.8XXA,D,S; X78.9XXA,D,S; X79.XXXA,D,S; X80.XXXA,D,S; X81.0XXA,D,S;<br>X81.1XXA,D,S; X81.8XXA,D,S; X82.0XXA,D,S; X82.1XXA,D,S; X82.2XXA,D,S; X82.8XXA,D,S;<br>X83.0XXA,D,S; X83.1XXA,D,S; X83.2XXA,D,S; X83.8XXA,D,S |
|--|--|--------------------------------------------------------------------------------------------------------------------------------------------------------------------------------------------------------------------------------------------------------------------------------------------------------------------------------------------------------------------------------------------------------------------------------------------------------------------------------------------------------------------------------------------------------------------------------------------------------------------------------------------------------------------------------------------------------------------------------------------------------------------------------|
